# Supplementary material for: A Holistic Approach to Analyze Systemic Jasmonate Accumulation in Individual Leaves of Arabidopsis Rosettes Upon Wounding
Source: PubMed Central journal article supplement (PMC6218591; doi:10.3389/fpls.2018.01569), 2018-10-30
Supplement: Image_1.pdf [file Image_1.pdf]

## Supplementary Material

- direct (first order) connections
- indirect (second order) connections
- third order connections

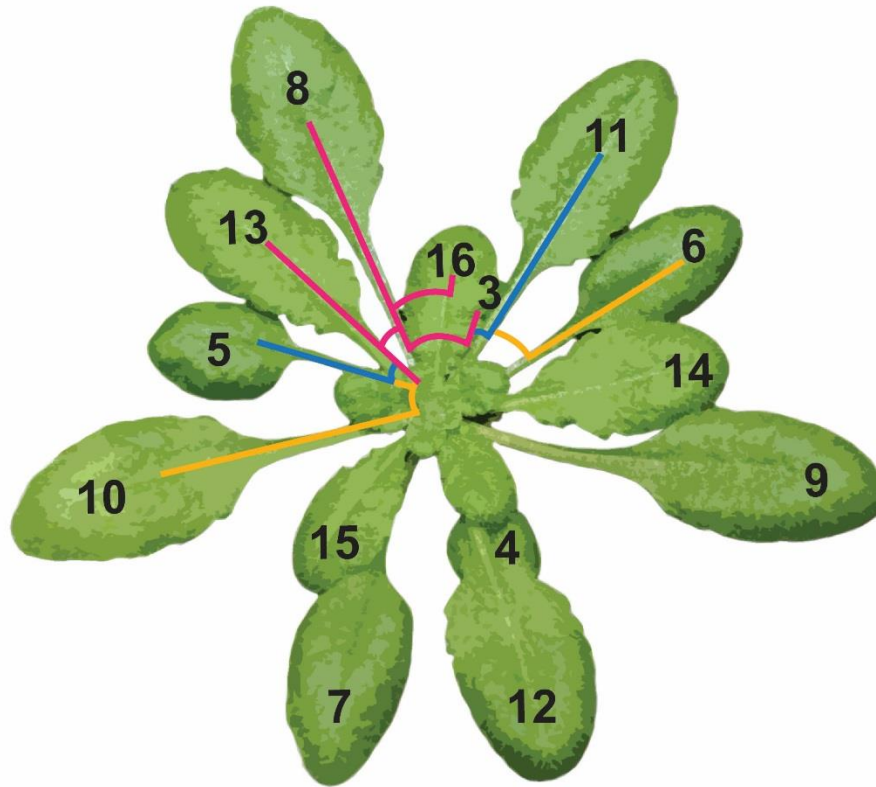

**Figure S1. Vascular connections of leaf 8 in a 5-week-old *Arabidopsis thaliana*.** Shown are the vascular connections of leaf 8 that was used as local leaf for all treatments. Red lines indicate first order connections ( $8\pm 5$  and  $8+8$ ). Those leaves share a direct connection to leaf 8. Blue lines indicate second order connections ( $8\pm 3$ ). Leaves are indirectly connected to leaf 8. Yellow lines indicate possible third order connections to leaf 8 via indirectly or directly connected leaves of leaf 8.
